# Supplementary material
Source: MDPI journal article supplement (https://www.mdpi.com/1996-1073/17/9/2107)
Supplement: s1 [file s1]

## Supplementary information

**Table S1.** Method Detection limits

|    |            |
|----|------------|
| Al | 0.059 mg/L |
| Na | 0.388 mg/L |
| Ca | 0.112 mg/L |
| Mg | 0.023 mg/L |
| Mn | 0.023 mg/L |
| S  | 0.074 mg/L |
| P  | 0.038 mg/L |

|    |            |
|----|------------|
| Sc | 0.037 mg/L |
| Y  | 0.004 mg/L |
| La | 0.003 mg/L |
| Ce | 0.008 mg/L |
| Pr | 0.003 mg/L |
| Nd | 0.008 mg/L |
| Sm | 0.004 mg/L |
| Eu | 0.003 mg/L |
| Gd | 0.003 mg/L |
| Tb | 0.002 mg/L |
| Dy | 0.004 mg/L |
| Ho | 0.002 mg/L |
| Er | 0.004 mg/L |
| Tm | 0.002 mg/L |
| Yb | 0.004 mg/L |
| Lu | 0.002 mg/L |
| Th | 0.007 mg/L |
| U  | 0.002 mg/L |
| Rb | 0.005 mg/L |
| Nb | 0.059 mg/L |
| Cs | 0.004 mg/L |
| Hf | 0.012 mg/L |
| Ta | 0.003 mg/L |
| Re | 0.002 mg/L |
| Os | 0.057 mg/L |
| Pt | 0.003 mg/L |

**Table S2:** Cerium and Europium anomalies in the whole rock

| <b>ID</b> | <b>Ce/Ce*</b> | <b>Eu/Eu*</b> |
|-----------|---------------|---------------|
| <b>D1</b> | 1.00          | 1.15          |
| <b>D1</b> | 0.95          | 1.17          |
| <b>C3</b> | 0.94          | 1.12          |
| <b>C2</b> | 0.93          | 1.13          |
| <b>C1</b> | 0.98          | 1.23          |
| <b>B</b>  | 0.95          | 1.31          |
| <b>B</b>  | 0.91          | 1.19          |
| <b>A2</b> | 0.74          | 1.17          |
| <b>A2</b> | 0.74          | 1.13          |
| <b>A1</b> | 0.70          | 1.05          |

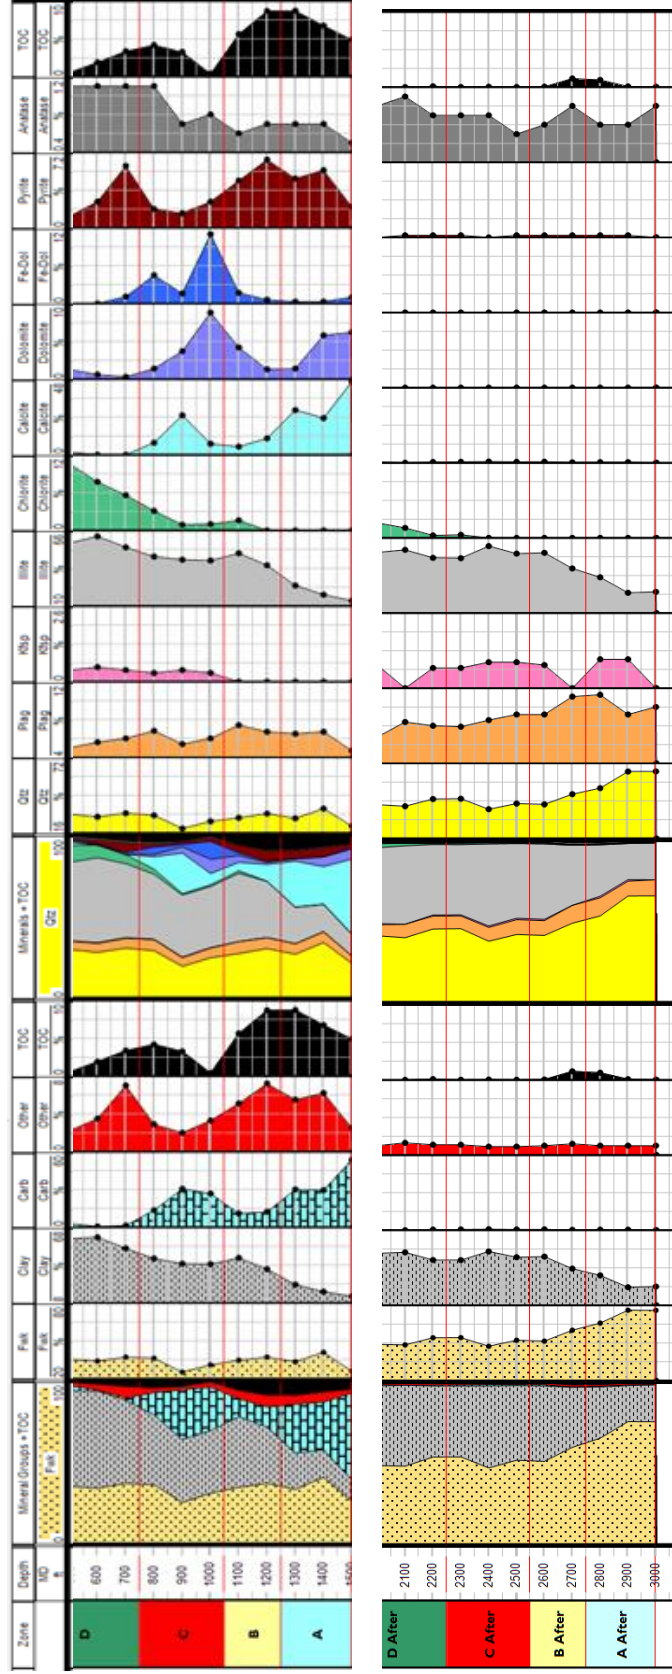

Figure S1. Comparative illustration to track the mineralogical changes in the residual samples after leaching. Calcite, dolomite, Fe-dolomite, and pyrite were completely removed using the traditional leaching chemicals. The TOC, which was measured via Leco Analyzer, recorded remnants in A1 sample and A2 samples. Chlorite dissolution was incomplete in the two uppermost samples from D1. The phases that did not dissolve were quartz, plagioclase, K-feldspar, illite, and anatase.

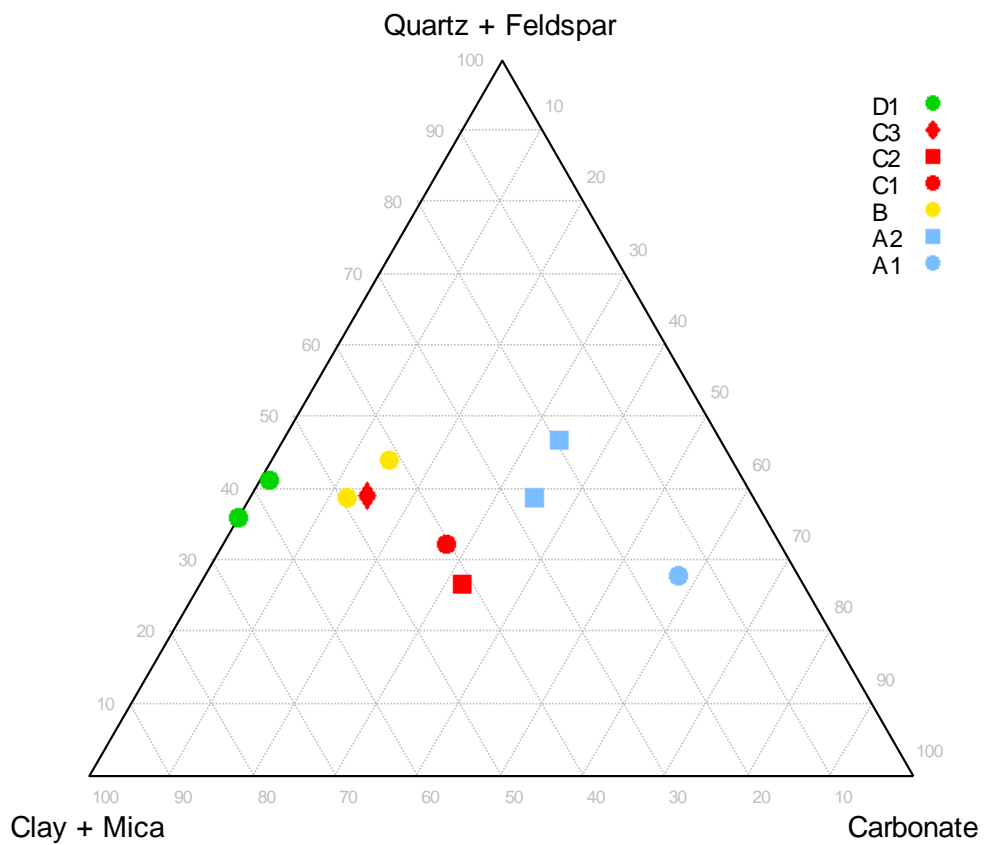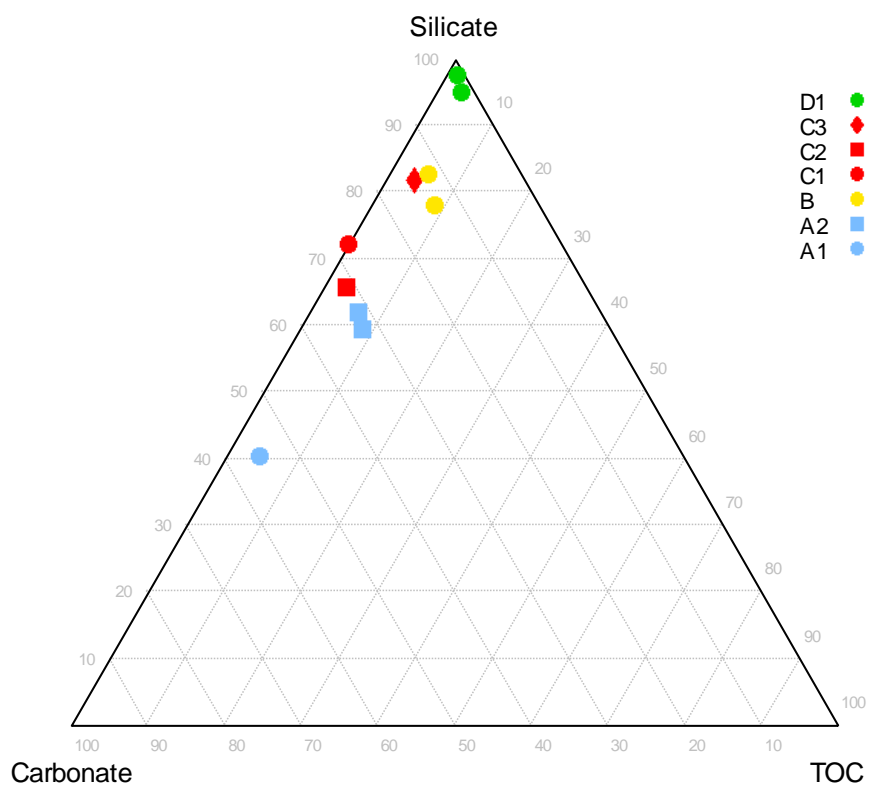

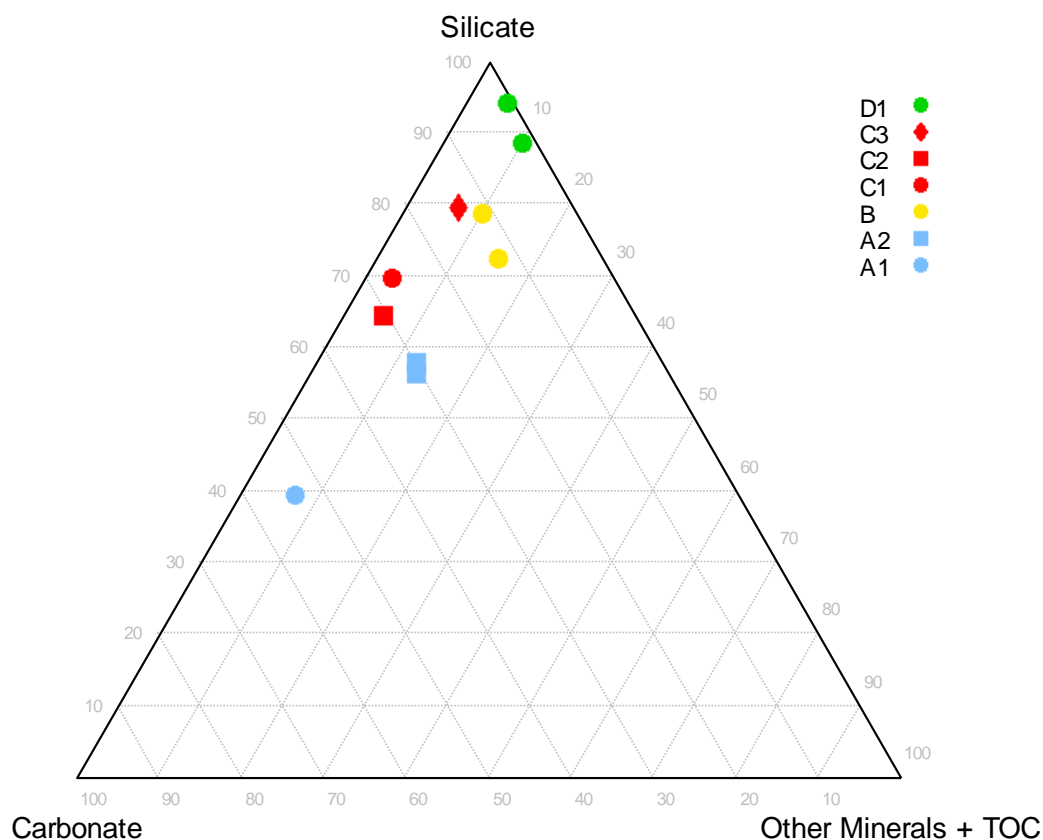

Figure S2 Ternary plots for mineralogical proportions of the samples

$Fwk = Quartz + Feldspar$ ;  $Clay = Total\ Clay\ Minerals + Mica$ ;  $Carb = Calcite + Dolomite + Fe-Dolomite$

Table S3. Formation location of global oil shales

| Sample ID | Formation               | Country        | Mineralogy                  | Age (System or Series) |
|-----------|-------------------------|----------------|-----------------------------|------------------------|
| GR        | Green River Formation   | United States  | Carbonate-quartz/feldspar   | Eocene                 |
| TM        | Timahdit oil shale      | Morocco        | Mixed layer clays-carbonate | Late Cretaceous        |
| GI        | Ghareb Formation        | Israel         | Carbonate                   | Late Cretaceous        |
| GJ        | Ghareb Formation        | Jordan         | Carbonate-clay              | Late Cretaceous        |
| KB        | Kimmeridgian Blackstone | United Kingdom | Claystone                   | Jurassic               |
| IF        | Irati Formation         | Brazil         | Quartz-illite               | Permian                |
| GD        | Glen Davis torbanite    | Australia      | Quartz                      | Permian                |
| PR        | Phosphoria Formation    | United States  | Quartz-ML clays             | Permian                |
| PO        | Pumpherston Torbanite   | United Kingdom | Quartz-kaolinite            | Carboniferous          |
| NA        | New Albany Shale        | United States  | Quartz-illite               | Mississippian-Devonian |
| EK        | Narva-E mine kukersite  | Estonia        | Carbonate-clay              | Ordovician             |
| AS        | Alum Shale Formation    | Sweden         | Quartz-illite               | Cambrian               |
